# Supplementary material for: Energy stress promotes P-bodies formation via lysine-63-linked polyubiquitination of HAX1
Source: EMBO J. 2024 May 20;43(13):11. doi: 10.1038/s44318-024-00120-6 (PMC11217408; doi:10.1038/s44318-024-00120-6)
Supplement: Supplementary file 1 — Appendix [file 44318_2024_120_MOESM1_ESM.pdf]

# **APPENDIX**

*Zhan et al.*

## **Table of contents**

### **Appendix Figures**

|                                                     |          |
|-----------------------------------------------------|----------|
| <b>Appendix Figure S1, related to Figure 6.....</b> | <b>2</b> |
| <b>Appendix Figure S2, related to Figure 8.....</b> | <b>4</b> |
| <b>Appendix Figure S3, related to Figure 8.....</b> | <b>6</b> |

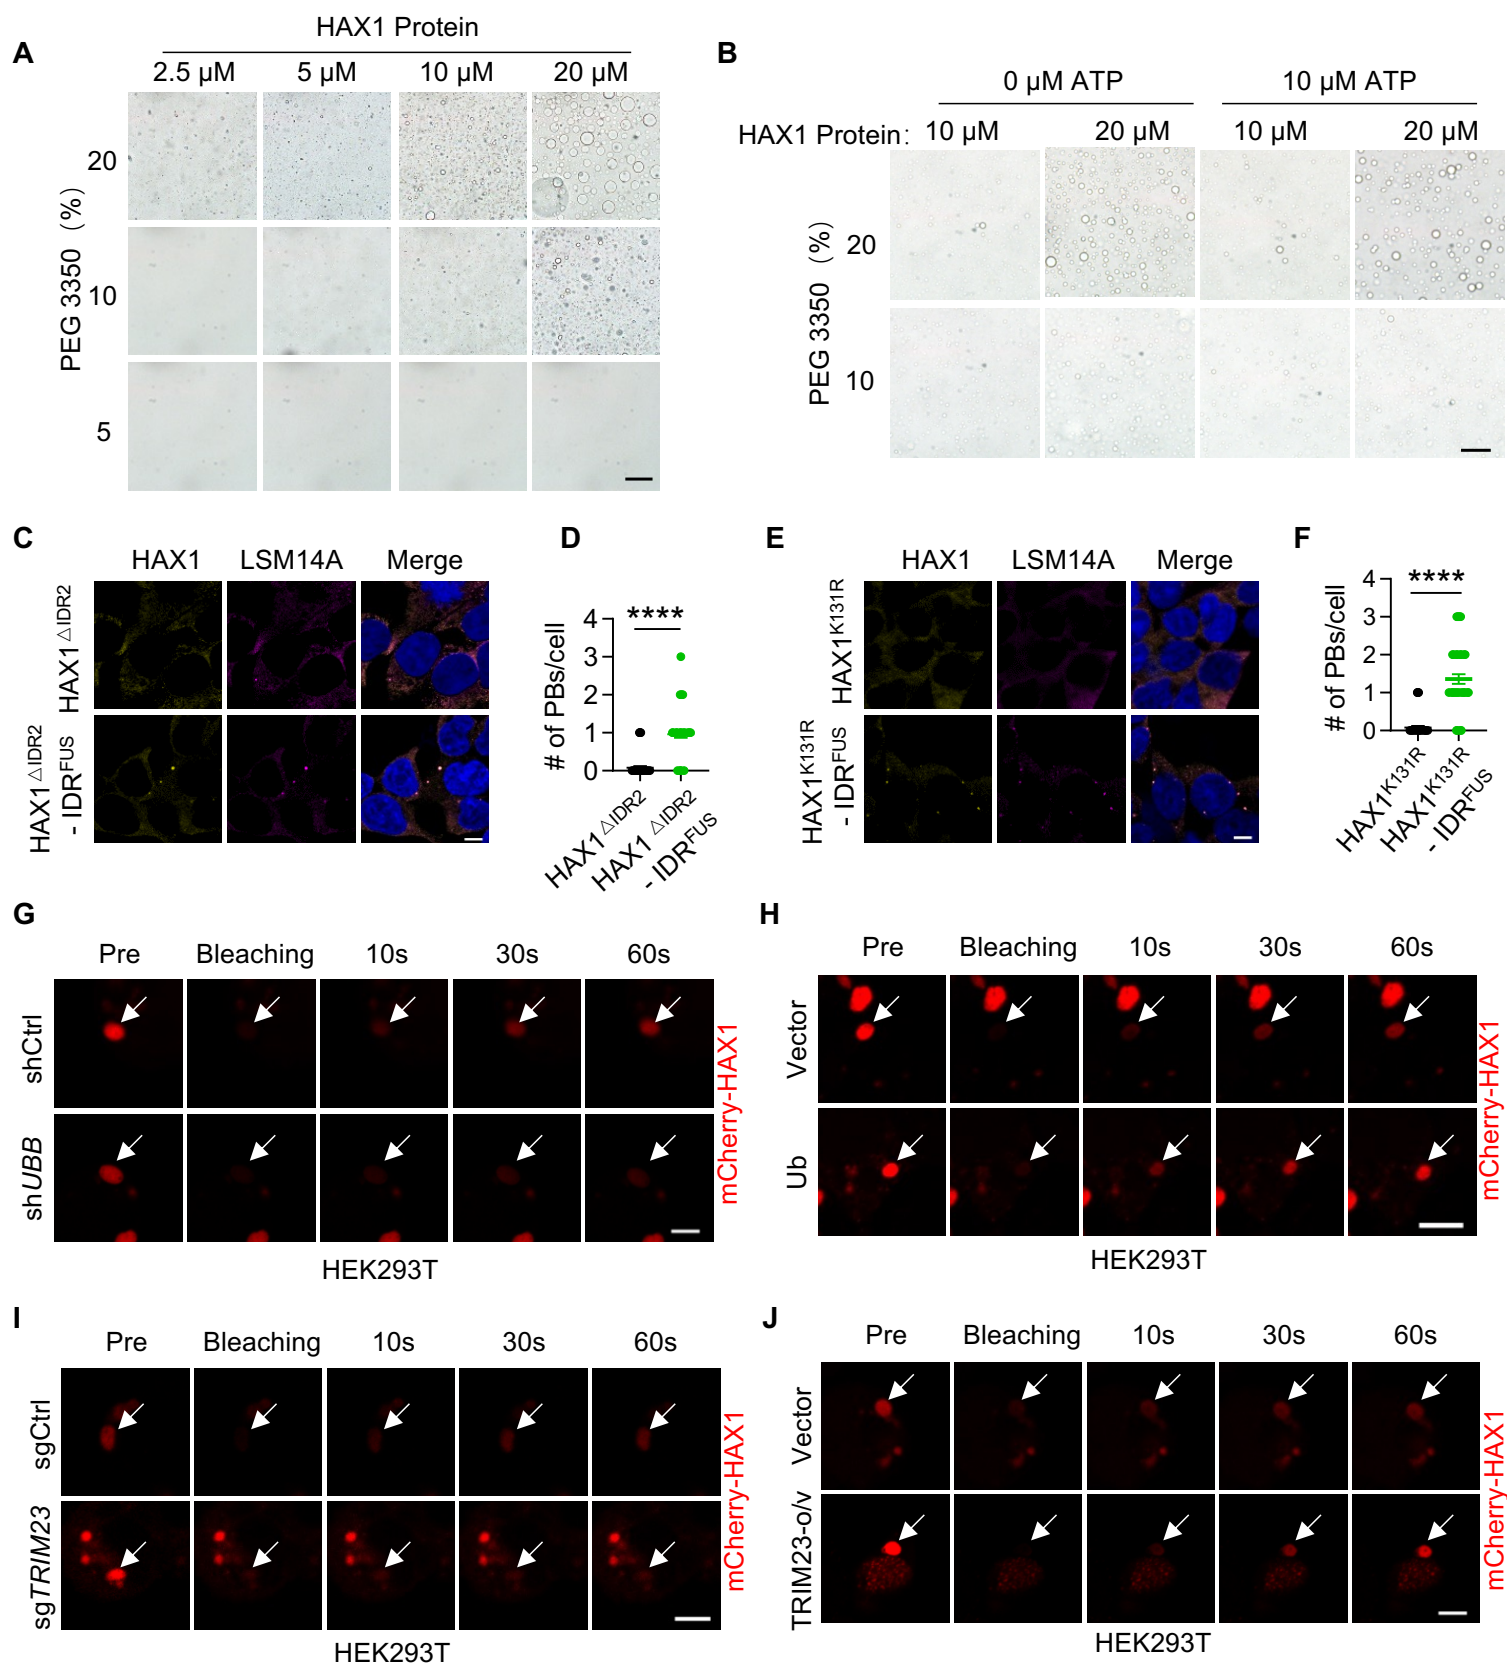

Appendix Figure S1 - Figure legend on the next page

**Appendix Figure S1. Phase separation of HAX1.**

(A) LLPS of recombinant HAX1 proteins in the presence of 150 mM NaCl and 5%-20% (w/v) PEG3350. Scale bar, 25  $\mu$ m.

5 (B) LLPS of recombinant HAX1 proteins in 150 mM NaCl and 10%-20% (w/v) PEG3350 with or without the addition of 10  $\mu$ M ATP. Scale bar, 25  $\mu$ m.

(C-F) *HAX1* KO HEK293T cells were transfected with mCherry-HAX1 <sup>$\Delta$ IDR2</sup> or mCherry-HAX1 <sup>$\Delta$ IDR2</sup>-IDR<sup>FUS</sup> (C, D), or mCherry-HAX1<sup>K131R</sup> or mCherry-HAX1<sup>K131R</sup>-IDR<sup>FUS</sup> (E, F) and stained for LSM14A. Representative images are shown in (C, E). The number of P-bodies within  
10 each cell is plotted in (D, F) (n = 50). Scale bar, 5  $\mu$ m. Error bars indicate SEM. \*\*\*\*P < 0.0001 (Student's t test).

(G-J) FRAP analysis of HAX1-mCherry in *UBB* knockdown (G), Ub overexpression (H), *TRIM23* knockout (I), or TRIM23 overexpression (J) HEK293T cells. Scale bar, 5  $\mu$ m.

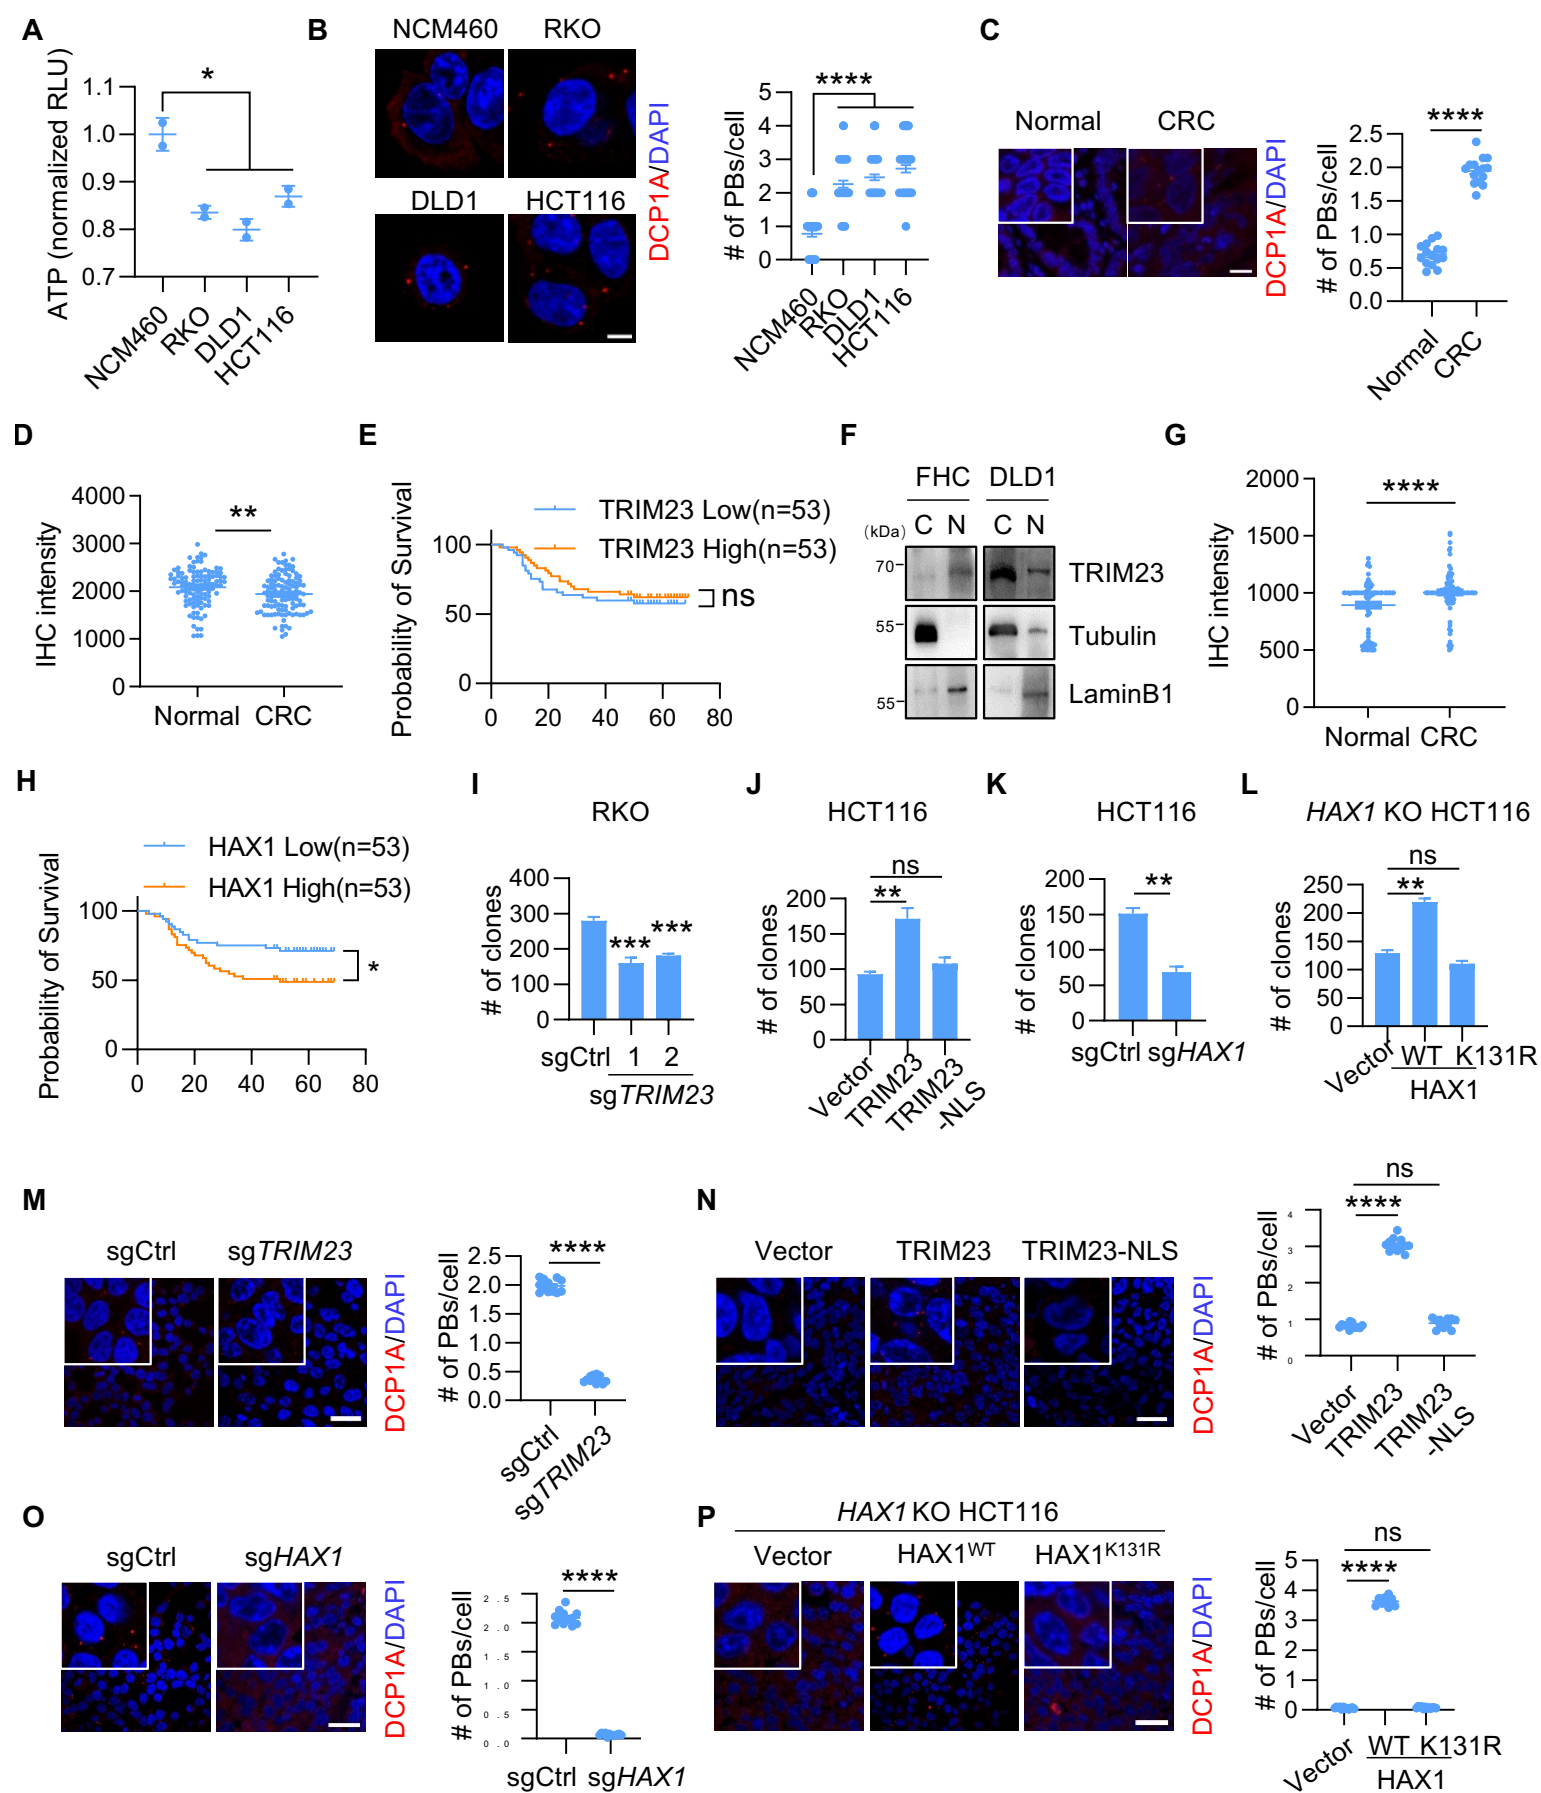

Appendix Figure S2 - Figure legend on the next page

**Appendix Figure S2. TRIM23 and HAX1 promote colorectal cancer progression and are associated with poor prognosis in tumor patients.**

(A) ATP levels in NCM460, RKO, DLD1 and HCT116 cells were detected. Statistical Error bars indicate SD. \* $P < 0.05$  (Student's  $t$  test).

(B) NCM460, RKO, DLD1 and HCT116 cells were stained for the P-body marker DCP1A (left). The number of P-bodies within each cell is plotted (right) ( $n = 50$ ). Scale bar, 5  $\mu\text{m}$ . Statistical Error bars indicate SEM. \*\*\*\* $P < 0.0001$  (Student's  $t$  test).

(C) Immunofluorescence staining of P-bodies in normal adjacent tissues and CRC tissues. The number of P-bodies within each cell from 15 patients is plotted (right). Scale bars, 20  $\mu\text{m}$  (inset: 10  $\mu\text{m}$ ). Statistical Error bars indicate SEM. \*\*\*\* $P < 0.0001$  (Student's  $t$  test).

(D) Quantitative immunohistochemical staining of TRIM23 in normal adjacent tissues and CRC tissues. Statistical Error bars indicate SEM. \*\* $P < 0.01$  (Student's  $t$  test).

(E) Kaplan-Meier survival analysis of CRC patients with high TRIM23 expression and low TRIM23 expression. ns: no significance (Log-rank test).

(F) The expression levels of TRIM23 in the cytoplasm (C) and nucleus (N) were determined via karyoplasmic separation in normal intestinal epithelial cells (FHC) and DLD1 cells.

(G) Quantitative immunohistochemical staining of HAX1 in normal adjacent tissues and CRC tissues. Statistical Error bars indicate SEM. \*\* $P < 0.01$  (Student's  $t$  test).

(H) Kaplan-Meier survival analysis of CRC patients with high and low HAX1 expression. \* $P < 0.05$  (Log-rank test).

(I-L) Colony formation assay in the indicated CRC cells. At least two biological replicates are plotted as the mean  $\pm$  SD. Ns: no significance, \*\* $P < 0.01$ , \*\*\* $P < 0.001$  (Student's  $t$  test).

(M-P) Immunofluorescence staining of P-bodies in xenograft tumors from Fig. 8J-M. The number of P-bodies represented by DCP1A within each cell from 12 mice are plotted (right). Scale bars: 20  $\mu\text{m}$  (inset: 10  $\mu\text{m}$ ). Error bars indicate SEM. ns: no significance, \*\*\*\* $P < 0.0001$  (Student's  $t$  test).

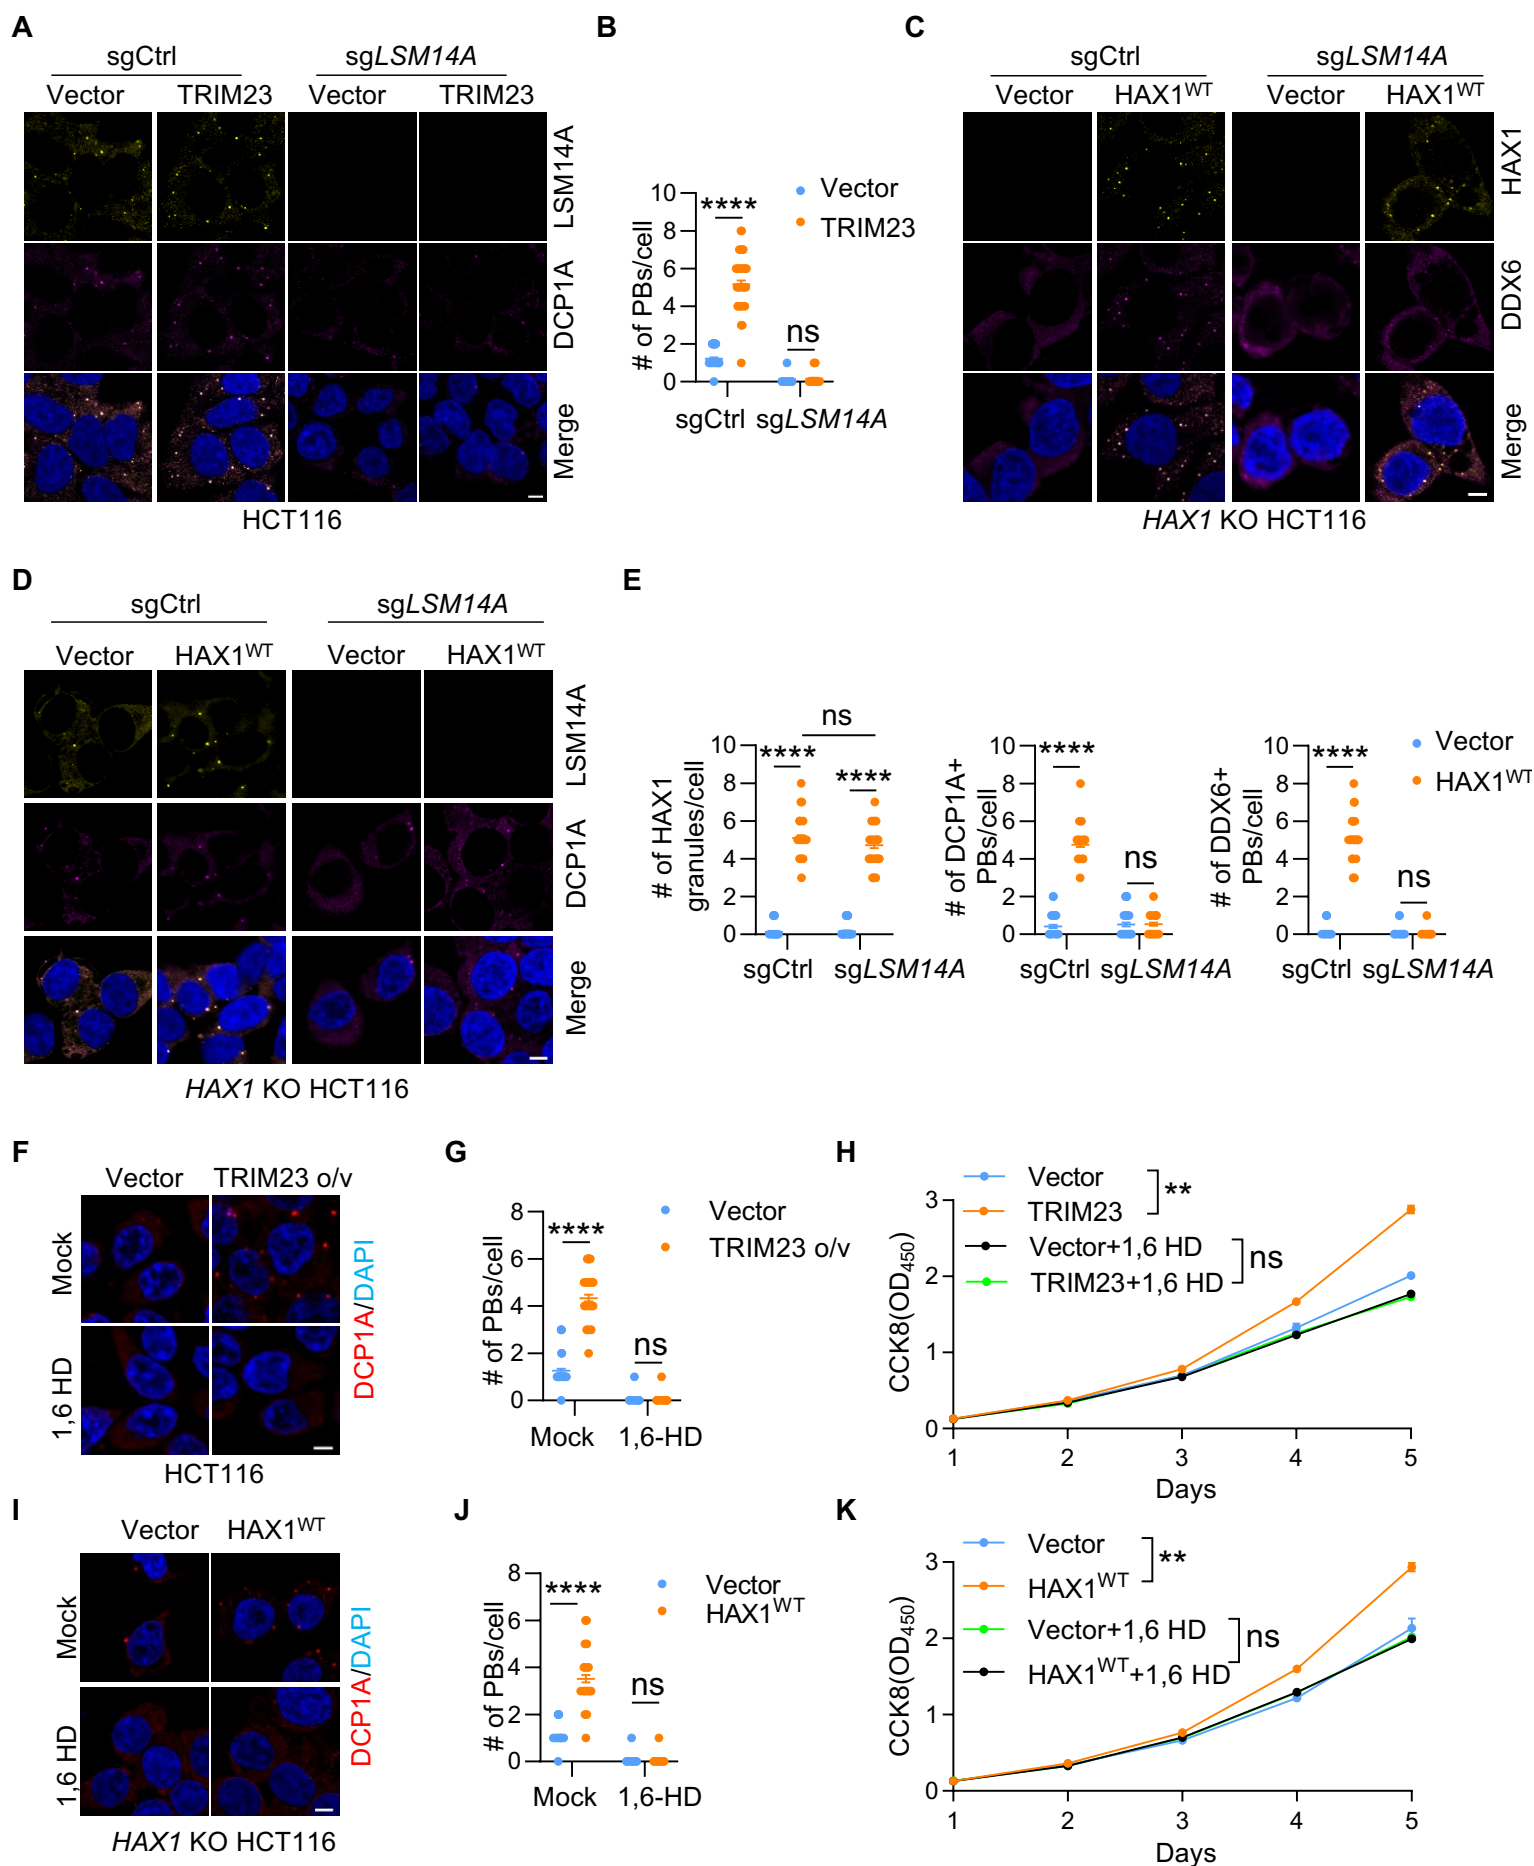

Appendix Figure S3 - Figure legend on the next page

**Appendix Figure S3. The effect of TRIM23/HAX1 on the tumorigenicity of CRC cells was dependent on P-bodies.**

(A, B) Control or TRIM23-overexpressing HCT116 cells were transduced with control or *LSM14A* sgRNA. Cells were stained for LSM14A and DCP1A and imaged (A). The number of P-bodies labeled with DCP1A within each cell is plotted in (B) (n = 50). Scale bar, 5  $\mu$ m. Error bars indicate SEM. Ns: no significance, \*\*\*\*P < 0.0001 (Two-way ANOVA).

(C-E) *HAX1* KO HCT116 cells expressing control or HAX1 were transduced with control or *LSM14A* sgRNA. Cells were stained for DDX6 and HAX1 (C) or for LSM14A and DCP1A (D). The number of HAX1 granules or P-bodies labeled with DCP1A or DDX6 within each cell are plotted in (E) (n = 50). Scale bar, 5  $\mu$ m. Error bars indicate SEM. Ns: no significance, \*\*\*\*P < 0.0001 (Two-way ANOVA).

(F-H) Control or TRIM23-overexpressing HCT116 cells were treated with or without 1,6-HD (3%, 5 min). Cells were stained for DCP1A and imaged (F) (Scale bar, 5  $\mu$ m), and the number of P-bodies within each cell is plotted in (G) (n = 50, Error bars indicate SEM). The proliferation of the indicated cells was determined by CCK-8 assay (H) (n = 3, Error bars indicate SD). ns: no significance, \*\*P < 0.01, \*\*P < 0.01 (Two-way ANOVA).

(I-K) *HAX1* KO HCT116 cells expressing control or HAX1 were treated with or without 1,6-HD (3%, 5 min). Cells were stained for DCP1A and imaged (I) (Scale bar, 5  $\mu$ m), and the number of P-bodies within each cell is plotted in (J) (n = 50, Error bars indicate SEM). The proliferation of the indicated cells was determined by CCK-8 assay (K) (n = 3, Error bars indicate SD). ns: no significance, \*\*P < 0.01, \*\*P < 0.01 (Two-way ANOVA).
